# Supplementary material for: Effect of microparticulation and xanthan gum on the stability and lipid digestion of oil-in-water emulsions stabilized by whey protein
Source: Royal Society of Chemistry journal article supplement (doi:10.1039/c8fo00182k), 2018-01-01

**Fig.A1** Particle size distributions of whey protein and microparticulated whey proteins. (# Particle distribution was measured with air as disperse medium.)

**Fig.A2** Course of back-scattering light profile in the function of test tube height for emulsions stabilized by WPC(a), MWP (pH 3.5) (b), MWP (pH 4.5) (c), MWP (pH 5.5) (d), MWP (pH 6.5) (e), MWP (pH 7.5) (f), and MWP (pH 8.5) (g).

**Fig.A3** Course of back-scattering light profile in the function of test tube height for emulsions stabilized by WPC-XG(a), MWP (pH 3.5)-XG (b), MWP (pH 4.5)-XG (c), MWP-XG (pH 5.5) (d), MWP (pH 6.5)-XG (e), MWP (pH 7.5)-XG (f), and MWP-XG (pH 8.5) (g).

**Fig.A4** Course of back-scattering light profile in the function of test tube height for emulsions stabilized by proteins (1) and xanthan gum-protein complexes (2) during digestion in simulated gastric fluid. (a1) WPC; (b1) MWP (pH 3.5); (c1) MWP (pH 4.5); (d1) MWP (pH 5.5); (e1) MWP (pH 6.5); (f1) MWP (pH 7.5); (g1) MWP (pH 8.5); (a2) WPC-XG; (b2) MWP (pH 3.5)-XG; (c2) MWP (pH 4.5)-XG; (d2) MWP (pH 5.5)-XG; (e2) MWP (pH 6.5)-XG; (f2) MWP (pH 7.5)-XG; (g2) MWP (pH 8.5)-XG.

**Fig.A5** Course of back-scattering light profile in the function of test tube height for emulsions stabilized by proteins (1) and xanthan gum-protein complexes (2) during digestion in simulated intestinal fluid. (a1) WPC; (b1) MWP (pH 3.5); (c1) MWP (pH 4.5); (d1) MWP (pH 5.5); (e1) MWP (pH 6.5); (f1) MWP (pH 7.5); (g1) MWP (pH 8.5); (a2) WPC-XG; (b2) MWP (pH 3.5)-XG; (c2) MWP (pH 4.5)-XG; (d2) MWP (pH 5.5)-XG; (e2) MWP (pH 6.5)-XG; (f2) MWP (pH 7.5)-XG; (g2) MWP (pH 8.5)-XG.

Fig.A1

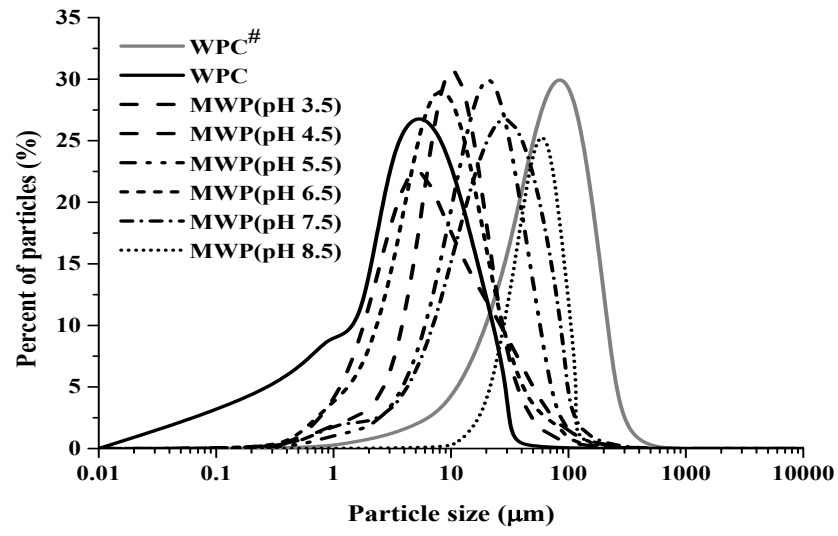

Fig.A2

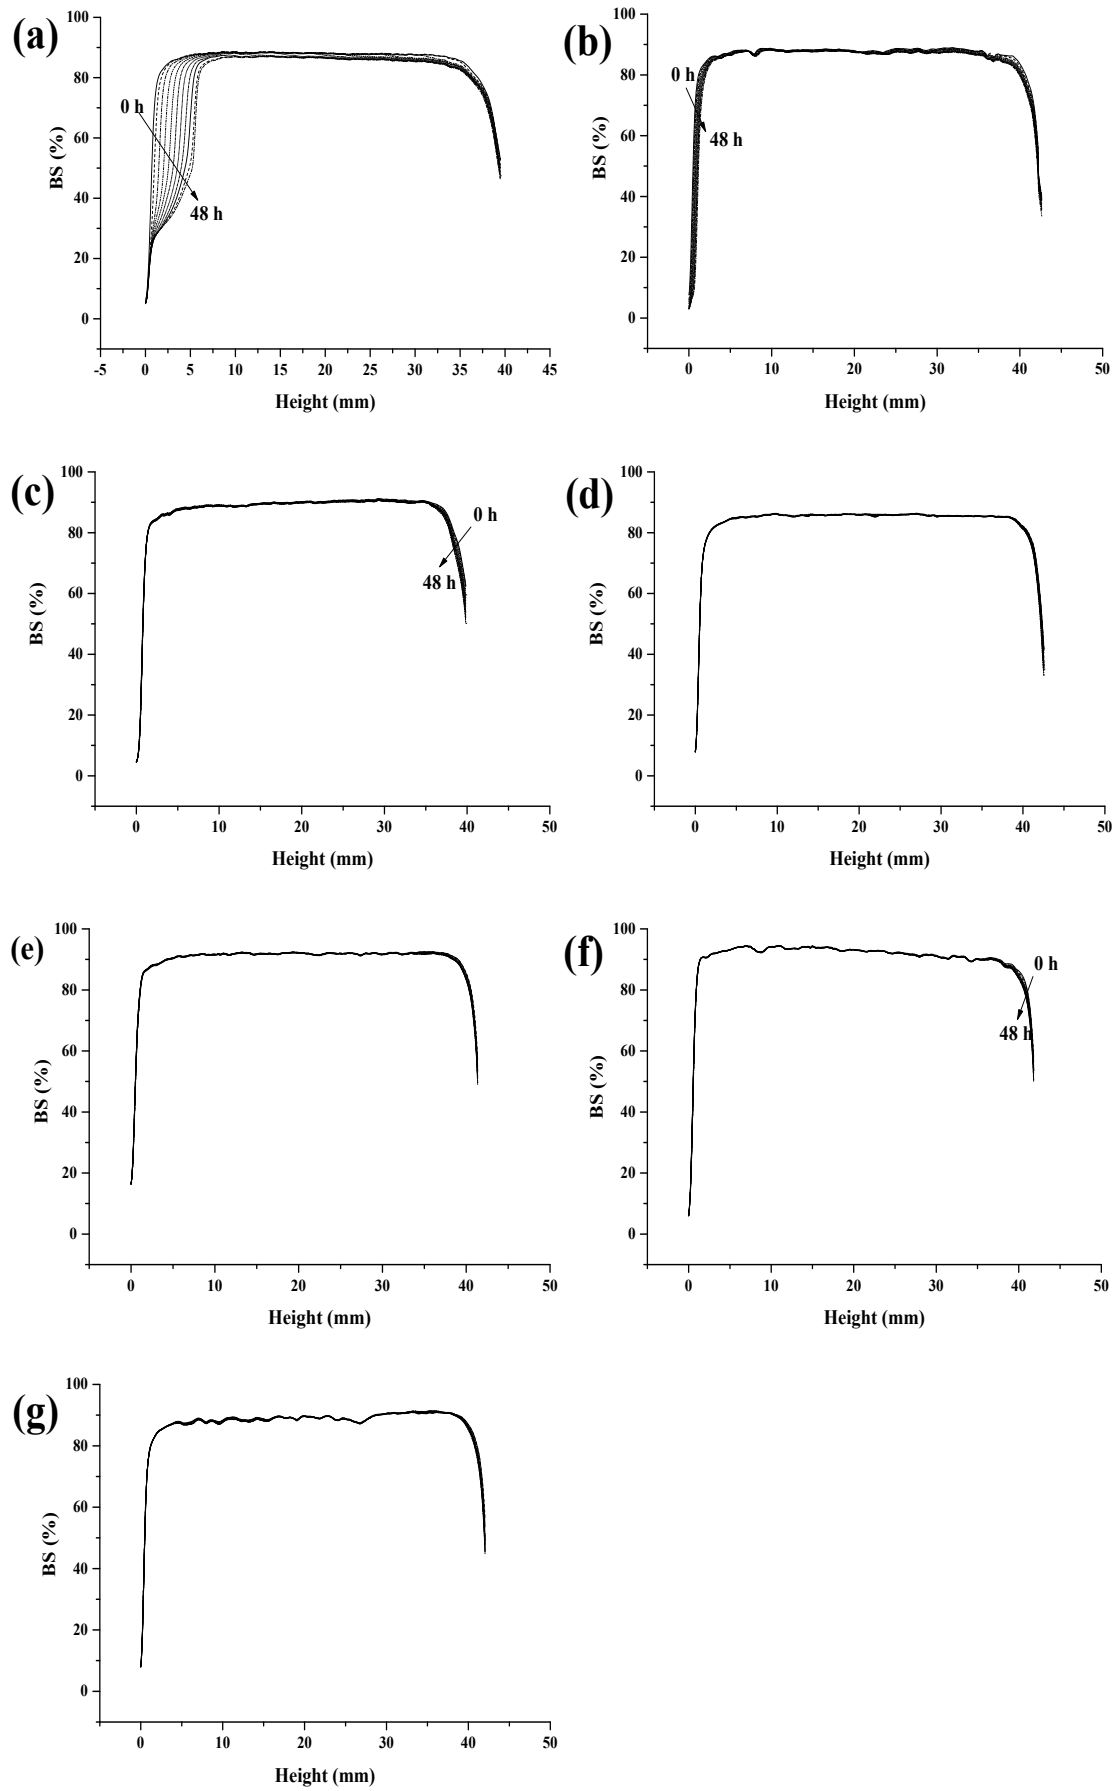

Fig.A3

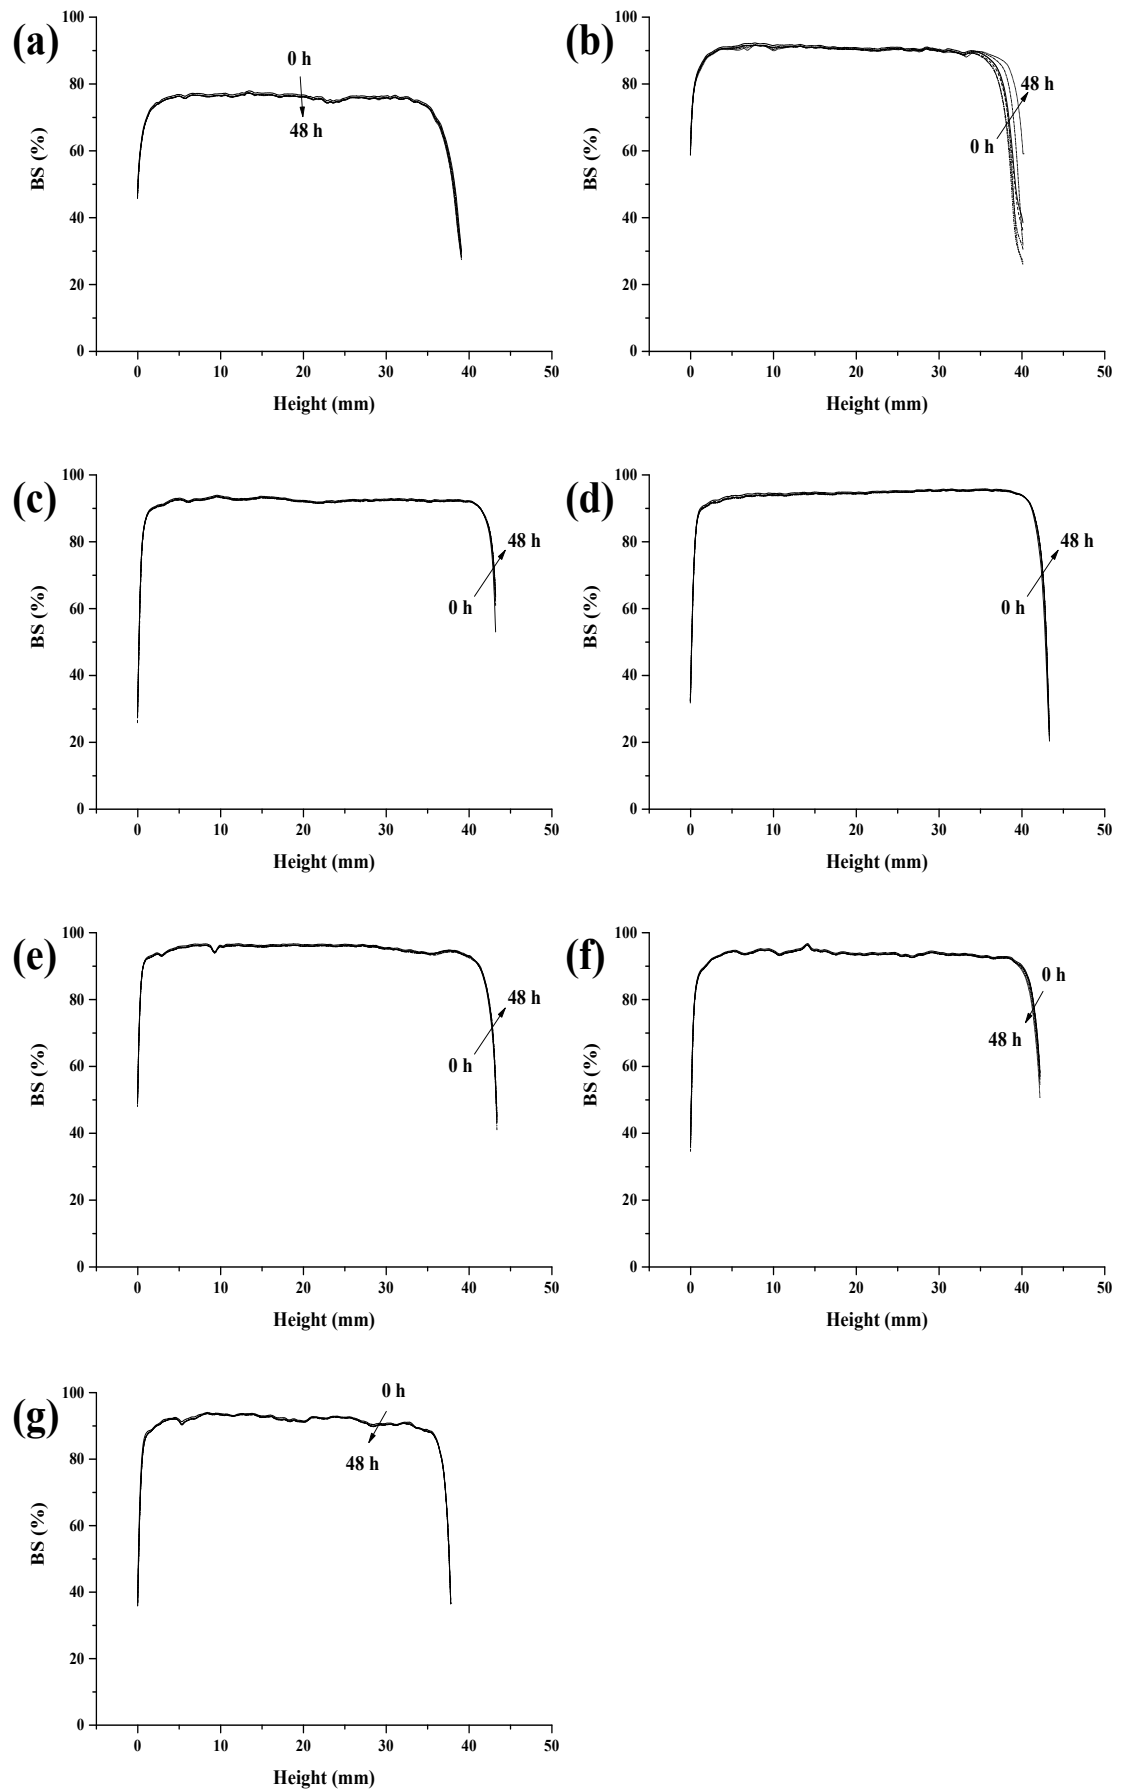

**Fig.A4**

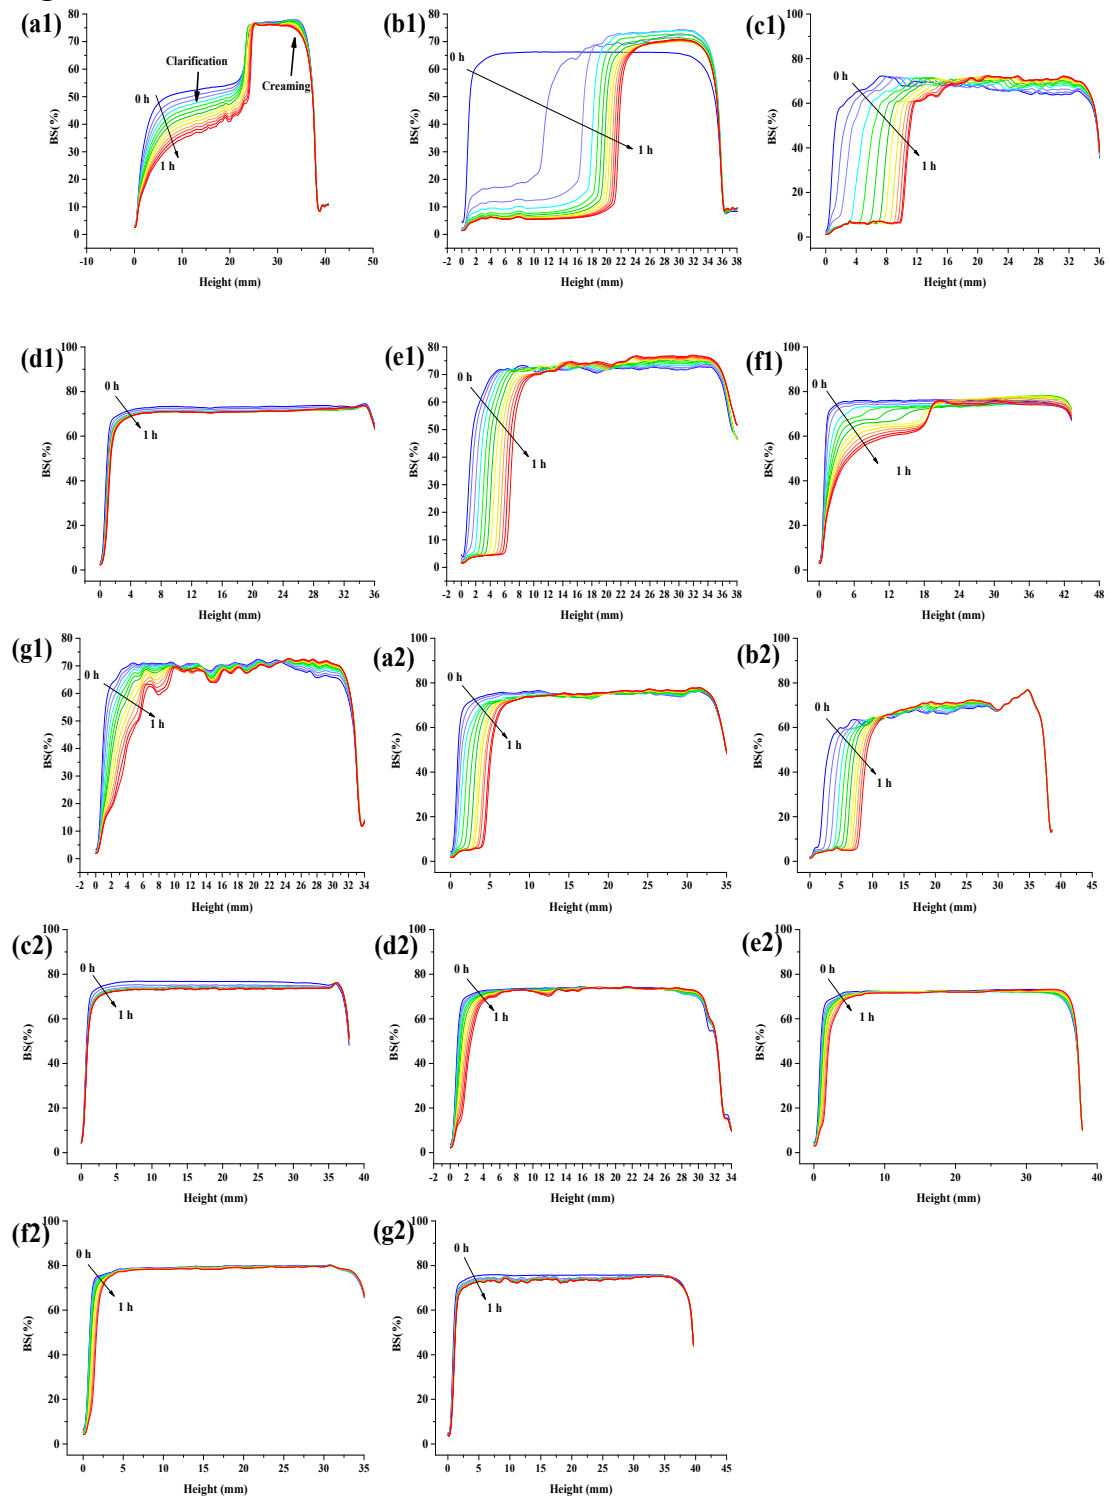

**Fig.A5**

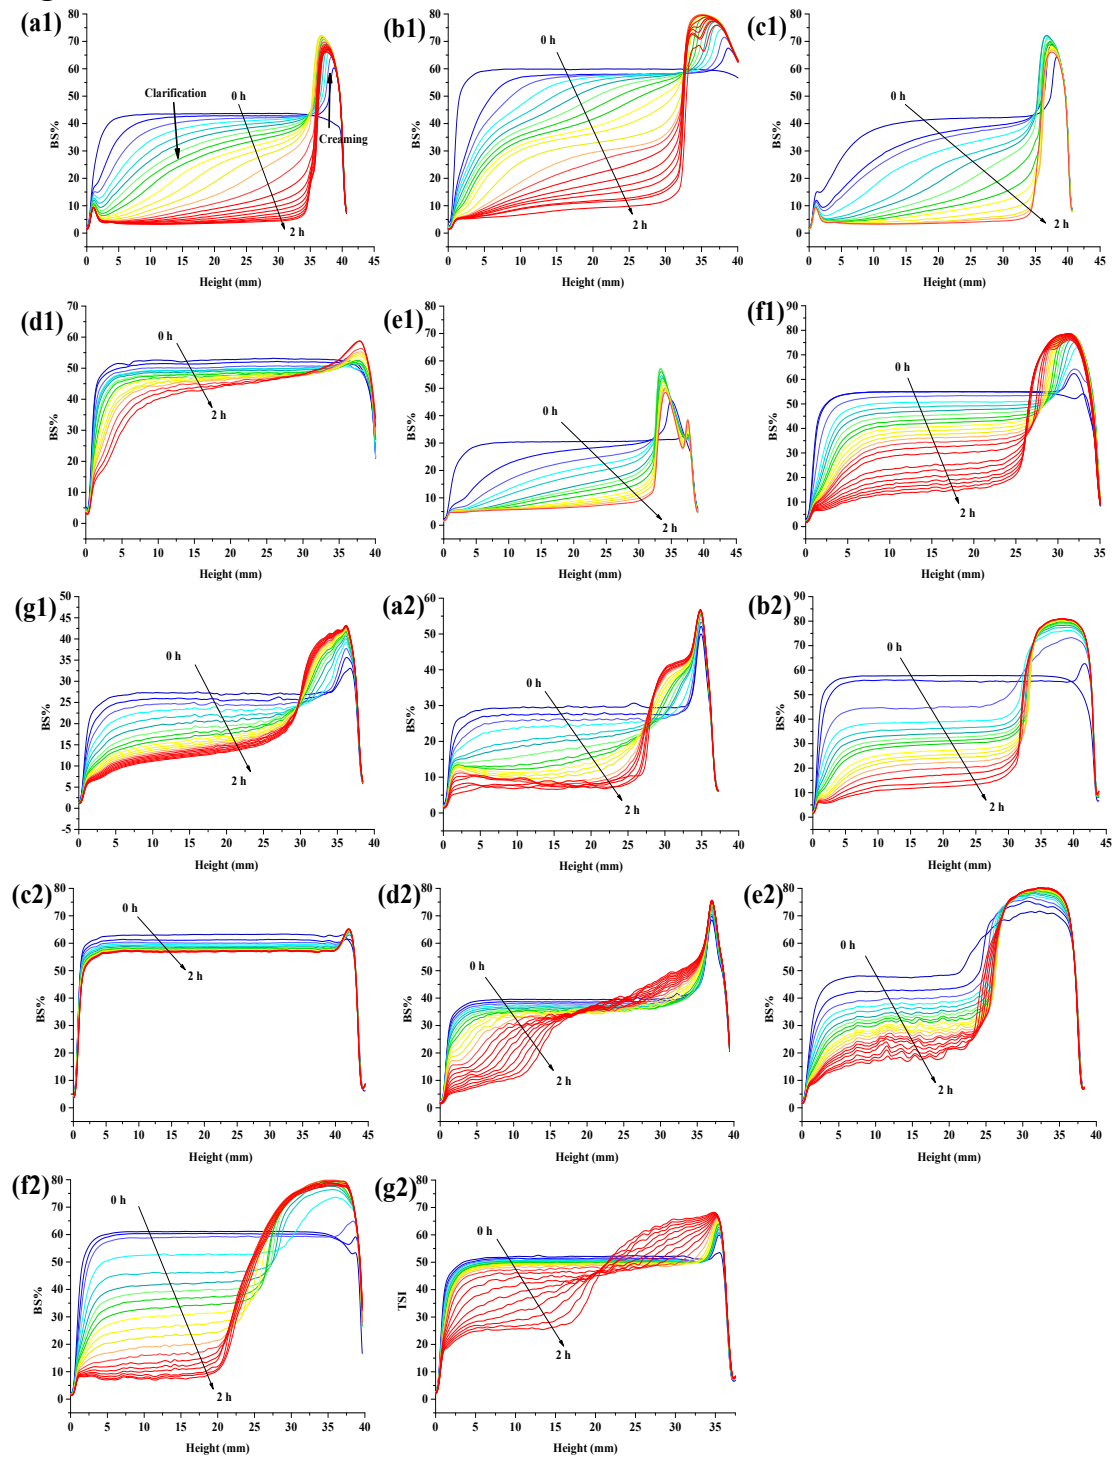

Supplement: c8fo00182k1.pdf [file c8fo00182k1.pdf]
